# Supplementary material for: Widespread Occurrence of Two Planktonic Ciliate Species (Urotricha, Prostomatida) Originating from High Mountain Lakes
Source: MDPI journal article supplement (doi:10.3390/d14050362), 2022-05-04
Supplement: s1 [file s1]

# V9 region of the SSU (Helix 49)

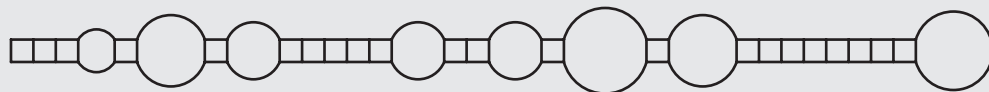

A GAU CG UC GA CUU- GGA  
 UCCU CC UU AGUGAU GGU AC CU C  
 |||| || |• ||||| || || |  
 AGGA GG AG UCACUA CCA UG GA G  
 A --- AU UA AA AAUU AG-

A GAU CG UC GA CUU- GGA  
 UCCU CC UU AGUGAU GGU AC CU C  
 |||| || |• ||||| || || |  
 AGGA GG AG UCACUA CCA UG GA G  
 A --- AU UA AA AAUU AG-

A GAU CG UC GA CUU- GGA  
 UCCU CC UU AGUGAU GGU AC CU C  
 |||| || |• ||||| || || |  
 AGGA GG AG UCACUA CCA UG GA G  
 A --- AU UA AA AAUU AG-

A GAU CG UC GA CUU- GGA  
 UCCU CC UU AGUGAU GGU AC CU C  
 |||| || |• ||||| || || |  
 AGGA GG AG UCACUA CCA UG GA G  
 A --- AU UA AA AAUU AG-

A GAU CG UC GA CUU- GGA  
 UCCU CC UU AGUGAU GGU AC CU C  
 |||| || |• ||||| || || |  
 AGGA GG AG UCACUA CCA UG GA G  
 A --- AU UA AA AAUU AG-

A GAU CG UC GA CUU- GGA  
 UCCU CC UU AGUGAU GGU AC CU C  
 |||| || |• ||||| || || |  
 AGGA GG AG UCACUA CCA UG GA G  
 A --- AU UA AA AAUU AG-

CU  
 UGUACAGGUC \  
 •••|||||| C  
 GUGUGUCCAG /  
 AG

UCCU  
 UGUACAG \  
 |••|||| U  
 AUGUGUC /  
 UUGAG

UCCU  
 UACCUAAG \  
 •|||||| U  
 GUGGAUUC /  
 UGAG

UCCU  
 CGUCGUUG \  
 |•|||||| (C) (U)  
 GUAGCAAC /  
 UGAG

CU  
 CGUACAGAGC \  
 |••|||||• U  
 GUGUGUCUUG /  
 AG

UCCU  
 CGUGCAGA \  
 |••|||| U  
 GUGCGUCU /  
 UGAG

*U. agilis/*  
*U. globosa*

*U. nais*

*U. furcata/*  
*U. pseudofurcata*

*U. castalia*  
 (LZ) (LM)

*'Halodinium*  
*verrucatum'*  
 (LC424401)

*'Plagiocampa*  
*sp.'*  
 (KY980324)
