# Supplementary material for: Widespread Occurrence of Two Planktonic Ciliate Species (Urotricha, Prostomatida) Originating from High Mountain Lakes
Source: MDPI journal article supplement (doi:10.3390/d14050362), 2022-05-04
Supplement: s1 [file s1]

**Table S1:** Main morphometric data on the investigated *Urotricha nais* strain CIL-2017/19 from Lake Faselfad and *Urotricha globosa* from Lake Hairlach. Measurements in  $\mu\text{m}$ . CV = coefficient of variation in %, M = median, IV = *in vivo*, Max = maximum, Mean = arithmetic mean, Meth. = applied methods, Min = minimum, n = number of specimens investigated, P = after protargol staining (Foissner's method), QPS = after quantitative protargol staining, SD = standard deviation.

| Character                                                 | Strain            | Meth. | Mean | M    | SD  | SE  | CV   | Min  | Max  | n  |
|-----------------------------------------------------------|-------------------|-------|------|------|-----|-----|------|------|------|----|
| Cell, length                                              | <i>U. nais</i>    | IV    | 24.4 | 23.0 | 5.1 | 1.1 | 21.1 | 16.9 | 34.8 | 21 |
|                                                           |                   | P     | 13.6 | 13.1 | 2.2 | 0.5 | 16.0 | 10.3 | 17.5 | 19 |
|                                                           | <i>U. globosa</i> | QPS   | 14.3 | 15.0 | 1.9 | 0.4 | 2.9  | 11.0 | 17.0 | 21 |
| Cell, width                                               | <i>U. nais</i>    | IV    | 19.6 | 18.3 | 4.1 | 0.9 | 20.7 | 14.5 | 28.9 | 21 |
|                                                           |                   | P     | 11.0 | 11.0 | 1.7 | 0.4 | 15.3 | 8.3  | 14.4 | 19 |
|                                                           | <i>U. globosa</i> | QPS   | 11.8 | 12.0 | 1.7 | 0.4 | 3.2  | 9.0  | 15.0 | 21 |
| Cell length:width, ratio                                  | <i>U. nais</i>    | IV    | 1.2  | 1.2  | 0.1 | 0.0 | 9.2  | 1.1  | 1.5  | 21 |
|                                                           |                   | P     | 1.2  | 1.2  | 0.1 | 0.0 | 11.1 | 1.1  | 1.5  | 19 |
|                                                           | <i>U. globosa</i> | QPS   | 1.2  | 1.2  | 0.1 | 0.0 | 1.4  | 1.1  | 1.4  | 21 |
| Distance between circumoral kinety and somatic kineties   | <i>U. nais</i>    | P     | -    | -    | -   | -   | -    | -    | -    | -  |
|                                                           | <i>U. globosa</i> | QPS   | 1.4  | 1.0  | 0.5 | 0.1 | 7.3  | 1.0  | 2.0  | 21 |
| Unciliated posterior portion, length                      | <i>U. nais</i>    | P     | 4.1  | 4.1  | 0.6 | 0.2 | 15.0 | 2.8  | 4.9  | 13 |
|                                                           | <i>U. globosa</i> | QPS   | 4.5  | 4.0  | 1.0 | 0.2 | 5.0  | 3.0  | 7.0  | 21 |
| Caudal cilia, length                                      | <i>U. nais</i>    | IV    | 10.8 | 10.8 | 2.4 | 0.5 | 21.8 | 7.1  | 16.6 | 21 |
|                                                           |                   | P     | 7.4  | 7.5  | 1.7 | 0.5 | 22.7 | 5.1  | 10.7 | 13 |
|                                                           | <i>U. globosa</i> | QPS   | 5.5  | 6.0  | 0.9 | 0.2 | 3.7  | 3.0  | 7.0  | 21 |
| Caudal cilia, number                                      | <i>U. nais</i>    | IV    | 1.0  | 1.0  | 0.0 | 0.0 | 0.0  | 1.0  | 1.0  | 21 |
|                                                           |                   | P     | 1.0  | 1.0  | 0.0 | 0.0 | 0.0  | 1.0  | 1.0  | 13 |
|                                                           | <i>U. globosa</i> | QPS   | 1.0  | 1.0  | 0.0 | 0.0 | 0.0  | 1.0  | 1.0  | 21 |
| Somatic cilia, length                                     | <i>U. nais</i>    | IV    | 5.4  | 5.9  | 1.1 | 0.2 | 20.0 | 3.8  | 7.2  | 21 |
|                                                           |                   | P     | 4.7  | -    | 0.7 | 0.2 | 15.7 | 3.5  | 6.3  | 20 |
|                                                           | <i>U. globosa</i> | QPS   | 4.6  | 5.0  | 0.7 | 0.2 | 3.9  | 4.0  | 6.0  | 13 |
| Somatic kineties, number                                  | <i>U. nais</i>    | P     | 17.2 | -    | 1.3 | 0.4 | 7.6  | 15.0 | 19.0 | 14 |
|                                                           | <i>U. globosa</i> | QPS   | 20.8 | 21.0 | 2.2 | 0.5 | 2.3  | 16.0 | 24.0 | 21 |
| Cilia in an anteriorly unshortened somatic kinety, number | <i>U. nais</i>    | P     | 8.9  | -    | 1.1 | 0.3 | 12.0 | 8.0  | 11.0 | 14 |
|                                                           | <i>U. globosa</i> | QPS   | 6.8  | 7.0  | 0.8 | 0.2 | 2.7  | 5.0  | 8.0  | 21 |
| Adoral organelle 1, length                                | <i>U. nais</i>    | P     | -    | -    | -   | -   | -    | -    | -    | -  |
|                                                           | <i>U. globosa</i> | QPS   | 2.0  | -    | 0.0 | 0.0 | 0.0  | 2.0  | 2.0  | 4  |
| Adoral organelle 2, length                                | <i>U. nais</i>    | P     | -    | -    | -   | -   | -    | -    | -    | -  |
|                                                           | <i>U. globosa</i> | QPS   | 1.0  | -    | 0.0 | 0.0 | 0.0  | 1.0  | 1.0  | 4  |
| Dikinetids in adoral organelle 1, number                  | <i>U. nais</i>    | P     | -    | -    | -   | -   | -    | -    | -    | -  |
|                                                           | <i>U. globosa</i> | QPS   | 4.0  | 4.0  | 0.0 | 0.0 | 0.0  | 4.0  | 4.0  | 5  |
| Dikinetids in adoral organelle 2, number                  | <i>U. nais</i>    | P     | -    | -    | -   | -   | -    | -    | -    | -  |
|                                                           | <i>U. globosa</i> | QPS   | 2.0  | 2.0  | 0.0 | 0.0 | 0.0  | 2.0  | 2.0  | 5  |
| Circumoral dikinetids/oral flaps, number                  | <i>U. nais</i>    | P     | -    | -    | -   | -   | -    | -    | -    | -  |
|                                                           | <i>U. globosa</i> | QPS   | 10.2 | 10.0 | 1.3 | 0.3 | 2.7  | 8.0  | 13.0 | 21 |
| Oral flaps, length                                        | <i>U. nais</i>    | P     | -    | -    | -   | -   | -    | -    | -    | -  |
|                                                           | <i>U. globosa</i> | QPS   | 1.9  | -    | 0.2 | 0.1 | 2.9  | 1.5  | 2.0  | 18 |
| Macronucleus, length                                      | <i>U. nais</i>    | IV    | 6.0  | 5.9  | 1.7 | 0.4 | 28.6 | 4.1  | 10.6 | 21 |
|                                                           |                   | P     | 4.9  | 5.0  | 0.7 | 0.2 | 14.7 | 4.0  | 6.5  | 19 |

|                                                |                   |     |     |     |     |     |      |     |      |    |
|------------------------------------------------|-------------------|-----|-----|-----|-----|-----|------|-----|------|----|
|                                                | <i>U. globosa</i> | QPS | 4.4 | 4.0 | 0.9 | 0.2 | 4.3  | 3.0 | 6.0  | 21 |
| Macronucleus, width                            | <i>U. nais</i>    | IV  | 5.8 | 5.7 | 1.6 | 0.4 | 27.9 | 4.0 | 10.5 | 21 |
|                                                |                   | P   | 4.1 | 4.0 | 0.5 | 0.1 | 11.9 | 3.4 | 5.2  | 19 |
|                                                | <i>U. globosa</i> | QPS | 3.2 | 3.0 | 0.6 | 0.1 | 4.2  | 2.0 | 5.0  | 21 |
| Anterior cell end to<br>macronucleus, distance | <i>U. nais</i>    | P   | -   | -   | -   | -   | -    | -   | -    | -  |
|                                                | <i>U. globosa</i> | QPS | 3.9 | 4.0 | 0.9 | 0.2 | 5.2  | 3.0 | 6.0  | 21 |
| Micronucleus, length                           | <i>U. nais</i>    | IV  | 2.1 | 2.1 | 0.6 | 0.1 | 27.6 | 1.1 | 3.3  | 21 |
|                                                |                   | P   | 1.7 | -   | 0.7 | 0.3 | 41.9 | 1.3 | 2.3  | 6  |
|                                                | <i>U. globosa</i> | QPS | 1.2 | 1.0 | 0.3 | 0.1 | 5.4  | 1.0 | 2.0  | 21 |
| Micronucleus, width                            | <i>U. nais</i>    | IV  | 2.0 | 1.9 | 0.8 | 0.2 | 42.0 | 1.2 | 4.9  | 21 |
|                                                |                   | P   | 1.6 | -   | 0.5 | 0.2 | 31.1 | 1.2 | 1.9  | 6  |
|                                                | <i>U. globosa</i> | QPS | 1.2 | 1.0 | 0.3 | 0.1 | 5.4  | 1.0 | 2.0  | 21 |
| Oral basket, distal<br>diameter                | <i>U. nais</i>    | P   | 4.3 | 4.3 | 0.6 | 0.1 | 13.4 | 3.2 | 5.3  | 15 |
|                                                | <i>U. globosa</i> | QPS | 4.0 | 4.0 | 0.4 | 0.1 | 2.1  | 3.0 | 5.0  | 21 |
| Oral basket, length                            | <i>U. nais</i>    | P   | -   | -   | -   | -   | -    | -   | -    | -  |
|                                                | <i>U. globosa</i> | QPS | 7.3 | 7.0 | 1.9 | 0.4 | 5.7  | 5.0 | 10.0 | 21 |
| Oral basket width:cell<br>width                | <i>U. nais</i>    | P   | 0.4 | 0.4 | 0.1 | 0.0 | 18.1 | 0.3 | 0.5  | 15 |
|                                                | <i>U. globosa</i> | QPS | 0.3 | 0.3 | 0.1 | 0.0 | 3.4  | 0.3 | 0.4  | 21 |
| Extrusomes, length                             | <i>U. nais</i>    | IV  | 1.8 | 1.8 | 0.5 | 0.1 | 26.9 | 1.0 | 2.7  | 21 |
|                                                |                   | P   | 1.0 | 1.0 | 0.1 | 0.0 | 7.0  | 0.9 | 1.1  | 7  |
|                                                | <i>U. globosa</i> | QPS | 1.3 | 1.2 | 0.2 | 0.0 | 3.5  | 1.0 | 1.5  | 21 |
