# Supplementary figures and images for: Widespread Occurrence of Two Planktonic Ciliate Species (Urotricha, Prostomatida) Originating from High Mountain Lakes
Source: MDPI journal article supplement (doi:10.3390/d14050362), 2022-05-04

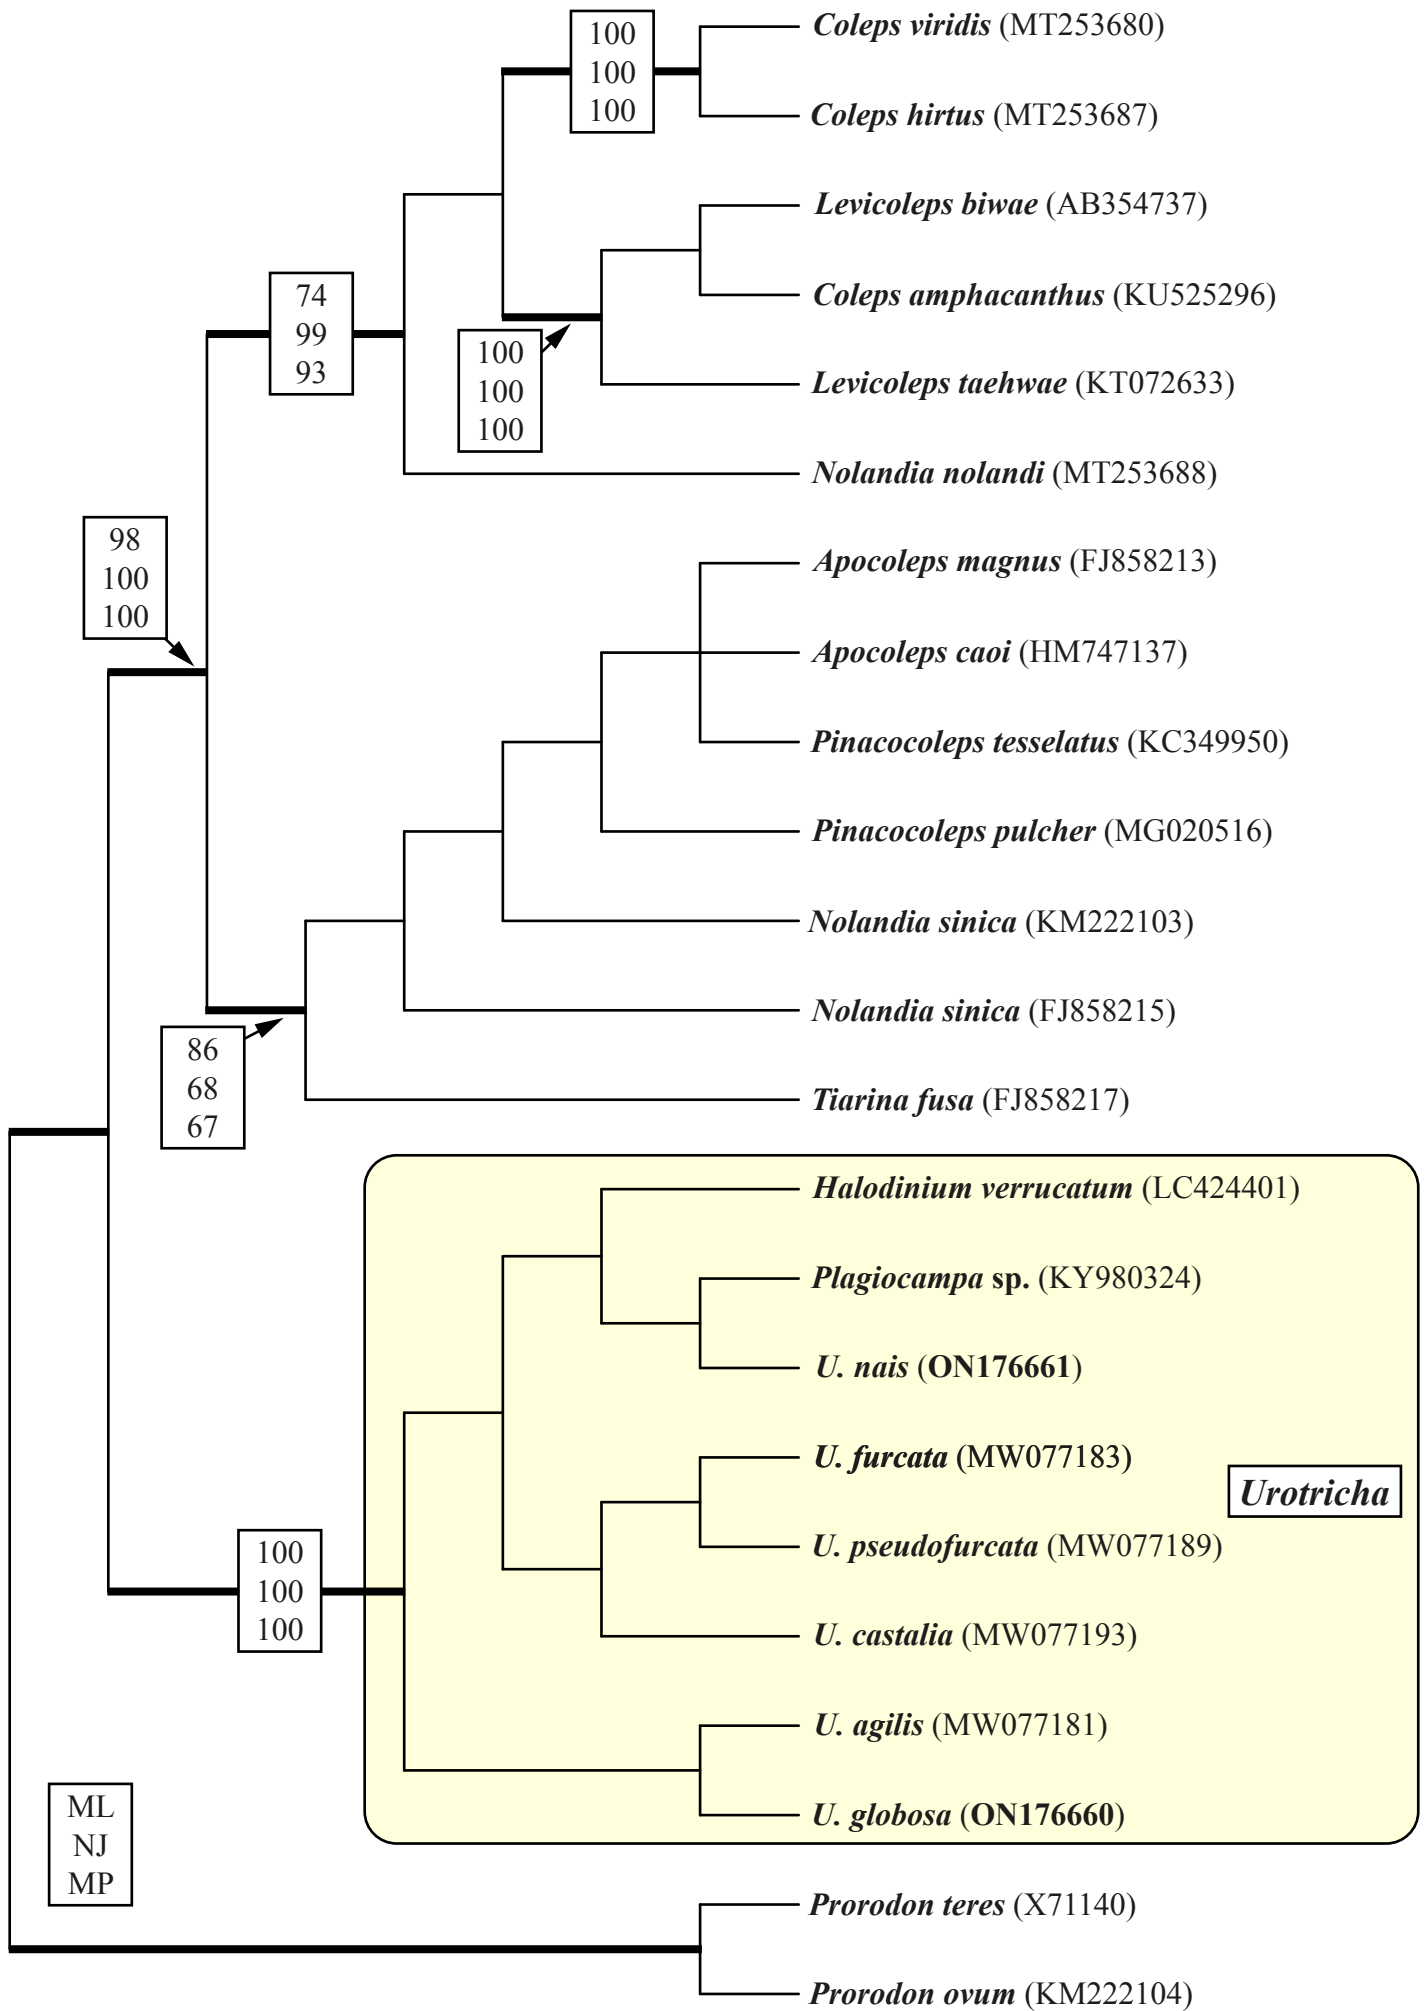

Supplement: s1 [file s1]
